# Supplementary material for: Why We Will Continue to Lose Our Battle with Cancers If We Do Not Stop Their Triggers from Environmental Pollution
Source: MDPI journal article supplement (doi:10.3390/ijerph18116107), 2021-06-05
Supplement: s1 [file s1]

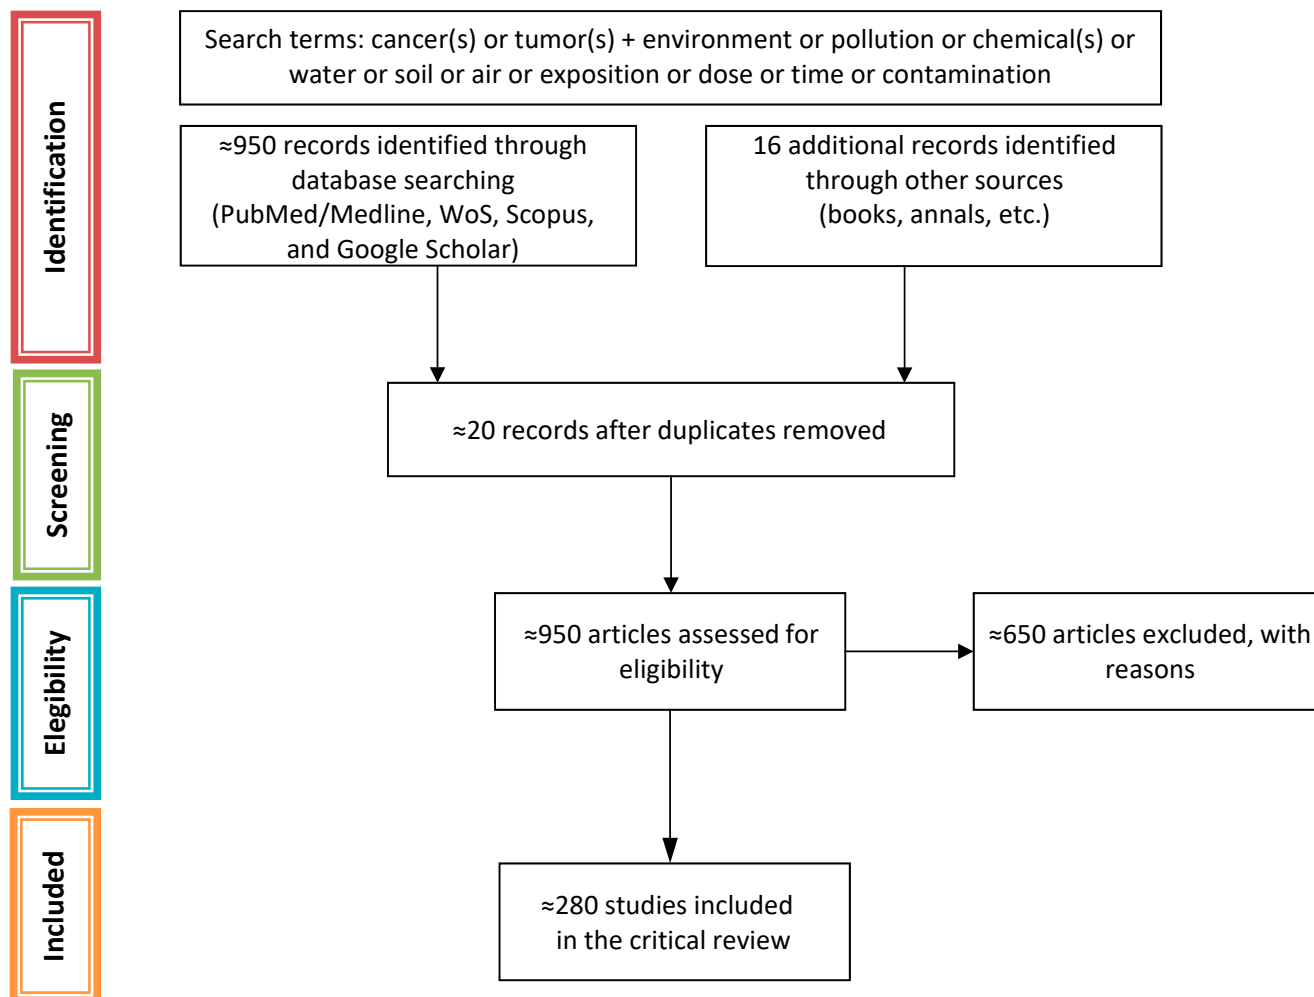

Supplementary Figure S1. A flow diagram of the literature search methodology carried out following the guidelines of the PRISMA (Moher et al. 2009) and the COSMOS-E (Dekkers et al. 2019) approaches, on studies publicly available on 28 February 2021
